# Supplementary material for: Isthmocele‑an iatrogenic pathology: A prospective study in a tertiary unit
Source: PubMed Central journal article supplement — Biomed Rep. 2024 Oct 15;22(1):2. doi: 10.3892/br.2024.1881 (PMC11522950; doi:10.3892/br.2024.1881), 2024-10-15
Supplement: Supplementary_Data.pdf [file Supplementary_Data.pdf]

Table SI. Values of the depths of the niche.

|                    |                         |       |
|--------------------|-------------------------|-------|
| N                  | Validated data          | 22    |
|                    | Missing data (no niche) | 30    |
| Mean               |                         | 0,55  |
| Median             |                         | 0,44  |
| Standard deviation |                         | 0,263 |
| Minimum            |                         | 0,27  |
| Maximum            |                         | 1,01  |

Table SII. Depth/total thickness ratio.

|                    |                         |         |
|--------------------|-------------------------|---------|
| N                  | Validated data          | 22      |
|                    | Missing data (no niche) | 30      |
| Mean               |                         | 37,36%  |
| Median             |                         | 32,50%  |
| Standard deviation |                         | 15,921% |
| Minimum            |                         | 16,00%  |
| Maximum            |                         | 66,00%  |

Table SIII. Association between the number of layers and the residual myometrial thickness in patients with niche.

|                               | Number of layers | N  | Mean    | Standard deviation       |
|-------------------------------|------------------|----|---------|--------------------------|
| Residual myometrial thickness | 1                | 13 | 0,8608  | 0,24479                  |
|                               | 2                | 9  | 0,8211  | 0,34075                  |
| T-test                        |                  |    |         |                          |
|                               | t                | df | P-value | Difference between means |
| Residual myometrial thickness | 0,319            | 20 | 0,753   | 0,03966                  |

Table SIV. Association between the number of layers and the total thickness of the myometrium in patients with niche.

|                            | Number of layers | N  | Mean    | Standard deviation       |
|----------------------------|------------------|----|---------|--------------------------|
| Total myometrial thickness | 1                | 13 | 1,4492  | 0,25899                  |
|                            | 2                | 9  | 1,4822  | 0,40791                  |
| T-test                     |                  |    |         |                          |
|                            | T                | df | P-value | Difference between means |
| Total myometrial thickness | -0,233           | 20 | 0,818   | -0,03299                 |

Table SV. The association between the shape of the niche and the number of layers used.

|                     |                 |           | Number of layers  |        | Total  |
|---------------------|-----------------|-----------|-------------------|--------|--------|
|                     |                 |           | 1                 | 2      |        |
| Shape of niche      | Semicircular    | Frequency | 6                 | 2      | 8      |
|                     |                 | %         | 75,0%             | 25,0%  | 100,0% |
|                     | Triangular      | Frequency | 6                 | 4      | 10     |
|                     |                 | %         | 60,0%             | 40,0%  | 100,0% |
|                     | Inclusion cysts | Frequency | 0                 | 2      | 2      |
|                     |                 | %         | 0,0%              | 100,0% | 100,0% |
|                     | Droplet         | Frequency | 1                 | 1      | 2      |
|                     |                 | %         | 50,0%             | 50,0%  | 100,0% |
| Total               |                 | Frequency | 13                | 9      | 22     |
|                     |                 | %         | 59,1%             | 40,9%  | 100,0% |
|                     |                 |           | Exact probability |        |        |
| Fisher's exact test |                 |           | 0.63800905        |        |        |

Table SVI. Distribution of niches.

|                   |       | Frequency | Percentage |
|-------------------|-------|-----------|------------|
| Validated<br>data | <50%  | 15        | 68,2       |
|                   | >50%  | 7         | 31,8       |
|                   | Total | 22        | 100,0      |

Table SVII. Association between niche and peritonization.

|                           |     |           | Peritonization yes/no |         | Total  |
|---------------------------|-----|-----------|-----------------------|---------|--------|
|                           |     |           | No                    | Yes     |        |
| Niche<br>yes/no           | No  | Frequency | 12                    | 18      | 30     |
|                           |     | %         | 40,0%                 | 60,0%   | 100,0% |
|                           | Yes | Frequency | 8                     | 14      | 22     |
|                           |     | %         | 36,4%                 | 63,6%   | 100,0% |
| Total                     |     | Frequency | 20                    | 32      | 52     |
|                           |     | %         | 38,5%                 | 61,5%   | 100,0% |
| Chi-square test           |     |           |                       |         |        |
|                           |     | Value     | df                    | P-value |        |
| Pearson Chi-Square        |     | 0,071     | 1                     | 0,790   |        |
| Cramer's V                |     | 0,037     | 1                     | 0,790   |        |
| Number of validated cases |     | 52        |                       |         |        |

Table SVIII. Association between peritonization and depth of niche.

|                | Peritonization yes/no | N  | Mean    | Standard deviation       |
|----------------|-----------------------|----|---------|--------------------------|
| Depth of niche | No                    | 8  | 0,5200  | 0,28685                  |
|                | Yes                   | 14 | 0,5686  | 0,25848                  |
| T-test         |                       |    |         |                          |
|                | t                     | df | P-value | Difference between means |
| Depth of niche | -0,408                | 20 | 0,688   | -0,04857                 |



Table SIX. Association between homogenous myometrium and niche.

|                                |     |           | Niche yes/no      |       | Total  |
|--------------------------------|-----|-----------|-------------------|-------|--------|
|                                |     |           | No                | Yes   |        |
| Homogenous myometrium (yes/no) | No  | Frequency | 2                 | 5     | 7      |
|                                |     | %         | 28,6%             | 71,4% | 100,0% |
|                                | Yes | Frequency | 28                | 17    | 45     |
|                                |     | %         | 62,2%             | 37,8% | 100,0% |
| Total                          |     | Frequency | 30                | 22    | 52     |
|                                |     | %         | 57,7%             | 42,3% | 100,0% |
|                                |     |           | Exact probability |       |        |
| Fisher's exact test            |     |           | 0.11884797        |       |        |
